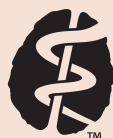

## APA Publishing

*Interim Publisher*

John McDuffie

*Editorial Director, Journals*

Michael D. Roy

*Managing Editor, Journals*

Demarie S. Jackson

*Production Manager, Journals*

Wendy Lieberman Taylor

## APA Department of Continuing Medical Education

*Associate Director, Focus*

Kristen Moeller

*Editorial Manager, CME and MOC*

*Examinations and Books*

Ann Thomas

*Focus* (ISSN 1541-4094) is published quarterly by American Psychiatric Association Publishing. Printed in the United States.

Periodicals postage paid at Arlington, VA, and additional mailing offices. POSTMASTER: Send address changes to *Focus*, Circulation Department, American Psychiatric Association Publishing, 1000 Wilson Blvd., Suite 1825, Arlington, VA 22209-3901.

## Subscriptions

U.S. APA member \$394, U.S. non-member \$616. For additional subscription options, including international and student rates, contact Customer Service at (703) 907-7300 or (800) 368-5777.

## Officers of the Association

Anita S. Everett, M.D., *President*

Altha J. Stewart, M.D., *President-Elect*

Philip R. Muskin, M.D., M.A., *Secretary*

Saul Levin, M.D., M.P.A., *CEO and Medical Director*

## Editorial Offices

Telephone: (703) 907-8637

Fax: (703) 907-7849

Journal Web site: [focus.psychiatryonline.org](http://focus.psychiatryonline.org)

*Focus* CME: [psychiatryonline.org/cme](http://psychiatryonline.org/cme)

## Change of Address and Assistance With Subscriptions

Contact Customer Service at (703) 907-7322 or (800) 368-5777 or e-mail [appi@psych.org](mailto:appi@psych.org).

## CME

Telephone: (703) 907-8637, Fax: (703)

907-7849, Email: [educme@psych.org](mailto:educme@psych.org)

## Online Access

Call (800) 368-5777 or e-mail [appi@psych.org](mailto:appi@psych.org) for assistance with online access to *Focus* and CME activities.

Copyright © 2017, American Psychiatric Association

## Editor

Mark Hyman Rapaport, M.D.  
*Atlanta, Georgia*

## Applied Armamentarium

Boadie Dunlop, M.D.  
*Atlanta, Georgia*

## Communication Commentary

Dorothy E. Stubbe, M.D.  
*New Haven, Connecticut*

## Ethics Commentary

Laura B. Dunn, M.D.  
*Palo Alto, California*

Laura Weiss Roberts, M.D.  
*Palo Alto, California*

## Patient Management Exercise

Ian A. Cook, M.D.  
*Los Angeles, California*

B. Harrison Levine, M.D., M.P.H.  
*Denver, Colorado*

## Safety Commentary

Yad M. Jabbarpour, M.D.  
*Catawba, Virginia*

## Senior Advisory Board

Carol A. Bernstein, M.D.

*New York, New York*  
Kathleen T. Brady, M.D., Ph.D.  
*Charleston, South Carolina*

Peter F. Buckley, M.D.

*Augusta, Georgia*

Glen O. Gabbard, M.D.

*Houston, Texas*

Ira M. Lesser, M.D.

*Torrance, California*

Charles F. Reynolds III, M.D.

*Pittsburgh, Pennsylvania*

Pedro Ruiz, M.D.

*Houston, Texas*

Stephen C. Scheiber, M.D.

*Glenview, Illinois*

Daniel K. Winstead, M.D.

*New Orleans, Louisiana*

Joel Yager, M.D.

*Denver, Colorado*

## Editorial Board

Richard Balon, M.D.

*Rochester Hills, Michigan*

Joseph A. Cheong, M.D.

*Nashville, Tennessee*

Raymond Lam, M.D., F.R.C.P.C.

*Vancouver, Canada*

Avram H. Mack, M.D.

*Philadelphia, Pennsylvania*

Vishal Madaan, M.D., M.B.B.S.

*Charlottesville, Virginia*

David Mischoulon, M.D., Ph.D.

*Boston, Massachusetts*

Francisco A. Moreno, M.D.

*Tucson, Arizona*

Philip R. Muskin, M.D.

*New York, New York*

Michele T. Pato, M.D., M.P.H.

*Brooklyn, New York*

Jeffrey Rakofsky, M.D.

*Atlanta, Georgia*

Lori E. Raney, M.D.

*Dolores, Colorado*

Victor I. Reus, M.D.

*San Francisco, California*

James W. Thompson, M.D., M.P.H.

*Palm Beach, Florida*

Marcia L. Verduin, M.D.

*Orlando, Florida*

Sidney Zisook, M.D.

*San Diego, California*

## Associate Editors eFOCUS

David L. Fogelson, M.D.

*Los Angeles, California*

Robert J. Boland, M.D.

*Boston, Massachusetts*

## Focus Self-Assessment

### Editorial Board

Robert J. Boland, M.D.

*Boston, Massachusetts*

Arden D. Dingle, M.D.

*Harlingen, Texas*

Laura Fochtman, M.D.

*Stony Brook, New York*

James W. Jefferson, M.D.

*Madison, Wisconsin*

Vishal Madaan, M.D.

*Charlottesville, Virginia*

Annette M. Matthews, M.D.

*Portland, Oregon*

Lindsay J. Moskowitz, M.D.

*New Hyde Park, New York*

Shawn Sidhu, M.D.

*Albuquerque, New Mexico*

Marcia L. Verduin, M.D.

*Orlando, Florida*

Randon S. Welton, M.D.

*Dayton, Ohio*

Eric R. Williams, M.D.

*Columbia, South Carolina*

## Editor Emerita

Deborah J. Hales, M.D.

*Washington, D.C.*
