SUMMER 2017 | VOLUME 15 | NUMBER 3

# Focus

The Journal of Lifelong Learning in Psychiatry

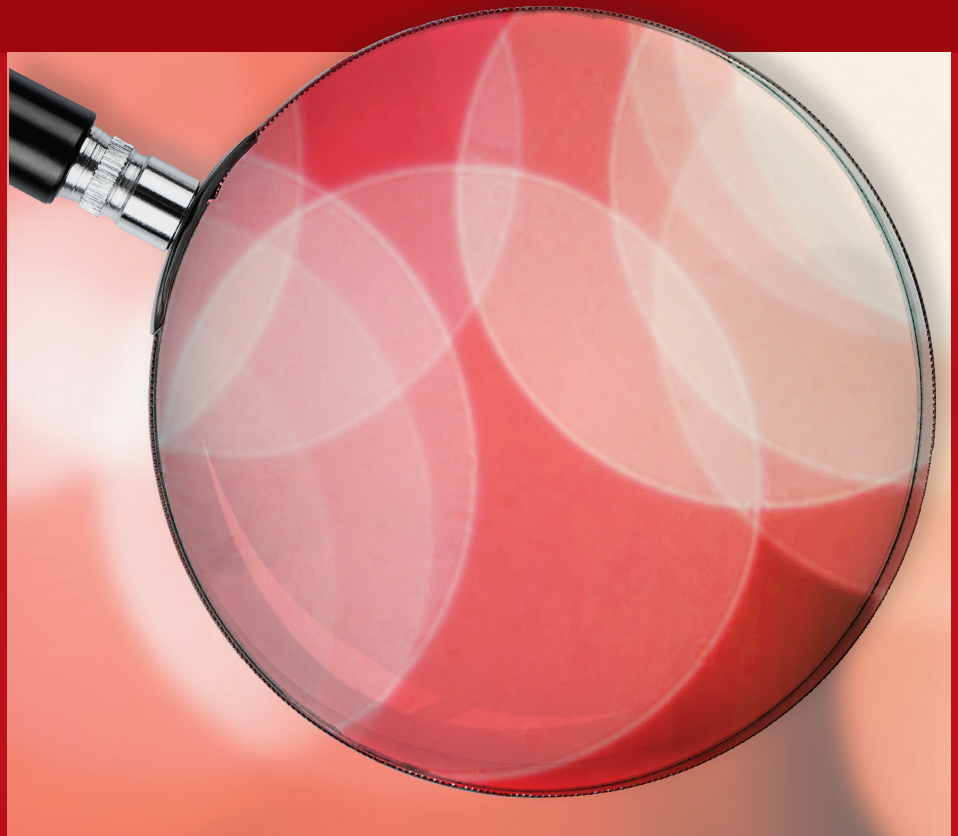

## Advances in Collaborative Care

Guest Editors: Mark D. Williams, M.D.,

and David J. Katzelnick, M.D.

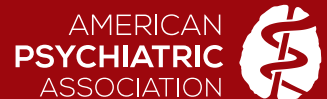

[focus.psychiatryonline.org](http://focus.psychiatryonline.org)
